# Supplementary material
Source: MDPI journal article supplement (https://www.mdpi.com/2073-4395/11/11/2343)
Supplement: s1 [file s1]

**Table S1.** Monthly total precipitation (mm) and average temperature (°C) near Prairie du Sac Wisconsin USA relative to 30-yr means from 1991 to 2020 (NOAA, [www.climate.gov](http://www.climate.gov)).

| Month     | Precipitation |      |      |            | Temperature |      |      |            |
|-----------|---------------|------|------|------------|-------------|------|------|------------|
|           | 2017          | 2018 | 2019 | 30-yr mean | 2017        | 2018 | 2019 | 30-yr mean |
| January   | 68            | 20   | 65   | 34         | -5.4        | -7.7 | -9.7 | -7.8       |
| February  | 42            | 47   | 76   | 34         | -1.0        | -7.3 | -8.6 | -5.8       |
| March     | 68            | 16   | 28   | 53         | 0.3         | 0.3  | -1.5 | 0.8        |
| April     | 141           | 83   | 119  | 102        | 9.8         | 2.0  | 7.6  | 7.4        |
| May       | 94            | 240  | 134  | 109        | 13.2        | 17.9 | 12.4 | 14.2       |
| June      | 157           | 127  | 118  | 138        | 19.5        | 20.8 | 18.9 | 19.7       |
| July      | 246           | 69   | 191  | 115        | 20.8        | 21.9 | 23.4 | 21.7       |
| August    | 62            | 226  | 131  | 110        | 19.1        | 21.6 | 19.7 | 20.6       |
| September | 30            | 141  | 193  | 99         | 18.0        | 18.2 | 18.2 | 16.4       |
| October   | 83            | 139  | 154  | 67         | 11.7        | 8.3  | 8.8  | 9.6        |
| November  | 16            | 59   | 57   | 56         | 1.5         | -0.8 | -0.9 | 2.3        |
| December  | 13            | 46   | 41   | 41         | -5.8        | -2.3 | -1.6 | -4.3       |
